# Supplementary material for: Circulatory Responses to Asphyxia Differ if the Asphyxia Occurs In Utero or Ex Utero in Near-Term Lambs
Source: PubMed Central journal article supplement (PMC4230987; doi:10.1371/journal.pone.0112264), 2014-11-13
Supplement: pone.0112264.s001.pdf [file pone.0112264.s001.pdf]

Table S1. Heart rate (% change from fetal) of individual *in utero* and *ex utero* asphyxia animals from start of asphyxia

| time (min) | Asphyxia <i>in utero</i> |       |       |       |       |       |       |       |       |     | Asphyxia <i>ex utero</i> |       |       |       |       |       |       |       |       |      |
|------------|--------------------------|-------|-------|-------|-------|-------|-------|-------|-------|-----|--------------------------|-------|-------|-------|-------|-------|-------|-------|-------|------|
|            | 1                        | 2     | 3     | 4     | 5     | 6     | 7     | 8     | mean  | SEM | 1                        | 2     | 3     | 4     | 5     | 6     | 7     | 8     | mean  | SEM  |
| fetal      | 0.0                      | 0.0   | 0.0   | 0.0   | 0.0   | 0.0   | 0.0   | 0.0   | 0.0   | 0.0 | 0.0                      | 0.0   | 0.0   | 0.0   | 0.0   | 0.0   | 0.0   | 0.0   | 0.0   | 0.0  |
| 0.00       | -1.5                     | -1.0  | -0.6  | -16.8 | 1.5   | -0.5  | -2.1  |       | -3.0  | 2.3 | -1.9                     | 3.2   | 0.3   | -2.1  | 6.8   | 0.1   | 1.1   | 0.8   | 1.0   | 1.0  |
| 0.30       | -27.9                    | -15.3 | -20.6 |       | -23.7 | -5.6  | -6.1  | -36.0 | -19.3 | 4.2 | 19.4                     |       | 6.2   | 5.3   |       | 11.7  | 27.1  | -1.9  | 11.3  | 4.3  |
| 1.00       | -12.4                    | -7.8  | -23.3 | -52.4 | -34.0 | -10.1 | -8.5  | -21.7 | -21.3 | 5.5 | 26.1                     |       | 11.9  | 10.9  | 11.7  | -1.8  | 30.8  | 8.8   | 14.1  | 4.2  |
| 1.30       | -49.1                    | -28.8 | -44.2 | -53.4 | -46.0 | -36.9 | -29.5 | -36.4 | -40.5 | 3.2 | 52.9                     | 2.4   | 17.2  | 8.0   | 47.3  | -28.7 | 16.6  | -12.2 | 12.9  | 9.7  |
| 2.00       | -49.6                    | -45.3 | -58.9 | -52.3 | -43.1 | -49.7 | -37.3 | -45.2 | -47.7 | 2.3 | 20.0                     | -1.0  | 6.7   | -14.3 | 77.2  | -35.6 | -18.2 | -20.3 | 1.8   | 12.4 |
| 2.30       | -49.5                    | -50.3 | -59.4 | -53.8 | -51.6 | -58.2 | -45.7 | -55.0 | -52.9 | 1.6 | 2.7                      | -10.0 | -22.9 | -18.9 | 30.2  | -35.5 | -35.1 | -20.7 | -13.8 | 7.7  |
| 3.00       | -49.5                    | -50.0 | -61.6 | -56.7 | -56.6 | -55.8 | -48.7 | -56.2 | -54.4 | 1.6 | -0.4                     | -54.5 | -23.1 | -39.0 | 12.9  | -31.8 | -38.5 | -40.4 | -26.9 | 8.0  |
| 3.30       | -49.8                    | -48.3 | -59.5 | -59.4 | -77.5 | -50.0 | -47.8 | -54.0 | -55.8 | 3.5 | -11.8                    | -53.3 | -24.4 | -43.9 | 11.9  | -32.5 | -38.7 | -45.3 | -29.7 | 7.5  |
| 4.00       | -48.8                    | -46.9 | -55.2 | -57.9 | -74.2 | -44.4 | -47.5 | -48.9 | -53.0 | 3.4 | -16.9                    | -12.2 | -26.0 | -45.3 | 20.4  | -32.0 | -37.9 | -47.1 | -24.6 | 7.8  |
| 4.30       | -46.2                    | -45.7 | -54.5 | -56.8 | -71.2 | -45.7 | -44.1 | -46.5 | -51.3 | 3.3 | -12.1                    | -14.6 | -25.9 | -41.9 | 21.3  | -32.6 | -34.4 | -47.1 | -23.4 | 7.7  |
| 5.00       | -43.9                    |       | -56.7 | -57.1 | -66.9 |       |       | -40.1 | -52.9 | 4.9 | 0.9                      | -18.9 | -24.7 | -39.2 | 17.3  | -33.5 | -23.6 | -46.6 | -21.0 | 7.5  |
| 5.30       | -43.8                    | -50.2 | -58.5 |       |       | -47.1 | -37.2 | -37.6 | -45.7 | 3.3 | 6.0                      | -20.7 | -46.2 | -37.6 | 10.2  | -33.7 | -17.7 | -45.8 | -23.2 | 7.8  |
| 6.00       | -47.0                    | -53.9 | -60.1 | -57.9 | -63.1 | -48.0 | -38.9 | -30.5 | -49.9 | 3.9 | -2.1                     | -22.5 | -46.1 | -35.2 | 5.0   | -33.4 | -24.1 | -45.9 | -25.5 | 6.7  |
| 6.30       | -55.6                    | -55.1 | -59.9 | -58.3 | -64.3 | -49.4 | -40.8 | -32.7 | -52.0 | 3.7 | -12.3                    | -23.6 |       | -33.5 | 3.0   | -33.4 | -26.1 | -44.1 | -24.3 | 5.9  |
| 7.00       | -57.6                    | -55.0 | -60.6 | -58.6 | -66.2 | -50.8 | -42.7 | -36.8 | -53.5 | 3.4 | -21.2                    | -25.7 | -23.2 | -34.1 | -0.1  | -34.2 | -26.8 | -43.7 | -26.1 | 4.5  |
| 7.30       | -60.9                    | -55.8 | -61.3 | -59.2 | -68.3 | -52.5 | -45.3 | -39.7 | -55.4 | 3.3 | -20.7                    | -28.2 | -26.5 | -35.2 | -5.1  | -37.1 | -30.2 | -43.5 | -28.3 | 4.1  |
| 8.00       | -63.6                    | -57.3 |       | -59.3 |       |       |       |       | -60.1 | 1.9 | -21.9                    | -31.0 | -28.4 | -37.1 | -9.2  | -38.9 | -30.4 | -42.7 | -30.0 | 3.8  |
| 8.30       | -63.3                    | -59.3 | -61.7 | -59.9 | -50.3 | -55.9 |       |       | -58.4 | 1.9 | -23.5                    | -33.1 | -30.4 | -39.4 | -12.7 | -41.0 | -37.3 | -42.1 | -32.4 | 3.6  |
| 9.00       | -63.2                    | -60.3 | -61.4 | -60.2 | -58.1 | -57.6 | -52.6 | -45.4 | -57.3 | 2.0 | -26.3                    | -36.3 | -31.8 | -41.6 | -16.2 | -7.8  | -40.4 | -42.8 | -30.4 | 4.5  |
| 9.30       | -60.0                    |       | -61.3 | -60.6 | -61.4 | -58.6 | -47.8 | -47.1 | -56.7 | 2.4 | -29.5                    | -39.4 | -34.4 | -43.8 | -18.4 |       | -43.6 | -44.6 | -36.2 | 3.6  |
| 10.00      | -57.6                    | -64.0 | -61.6 | -60.5 |       |       |       | -48.5 | -58.4 | 2.7 | -32.7                    | -41.5 | -36.7 | -46.0 | -20.4 |       |       | -47.5 | -37.5 | 4.1  |

SEM; standard error of the mean
