# Supplementary material for: Circulatory Responses to Asphyxia Differ if the Asphyxia Occurs In Utero or Ex Utero in Near-Term Lambs
Source: PubMed Central journal article supplement (PMC4230987; doi:10.1371/journal.pone.0112264), 2014-11-13
Supplement: pone.0112264.s002.pdf [file pone.0112264.s002.pdf]

Table S2. Mean blood pressure (% change from fetal) of individual *in utero* and *ex utero* asphyxia animals from start of asphyxia

| time (min) | Asphyxia <i>in utero</i> |       |       |       |       |       |       |       |       |     | Asphyxia <i>ex utero</i> |       |       |       |       |       |       |       |       |      |      |
|------------|--------------------------|-------|-------|-------|-------|-------|-------|-------|-------|-----|--------------------------|-------|-------|-------|-------|-------|-------|-------|-------|------|------|
|            | 1                        | 2     | 3     | 4     | 5     | 6     | 7     | 8     | mean  | SEM | 1                        | 2     | 3     | 4     | 5     | 6     | 7     | 8     | mean  | SEM  |      |
| fetal      | 0.0                      | 0.0   | 0.0   | 0.0   | 0.0   | 0.0   | 0.0   | 0.0   | 0.0   | 0.0 | 0.0                      | 0.0   | 0.0   | 0.0   | 0.0   | 0.0   | 0.0   | 0.0   | 0.0   | 0.0  |      |
| 0.00       | 0.1                      | 20.0  | 20.7  | 28.2  | 18.6  | 18.6  | 20.0  |       | 18.0  | 3.0 | 13.7                     | 11.0  | 0.8   | 14.7  | 14.4  | -14.4 | -2.2  | -8.5  | 3.7   | 4.0  |      |
| 0.30       | 24.3                     | 43.0  | 30.6  |       | 11.4  | 27.1  | 28.7  | 18.4  | 26.2  | 3.8 | 33.7                     |       |       | 14.2  |       | 14.8  | 28.2  | 19.9  | 22.2  | 3.8  |      |
| 1.00       | 9.9                      | 30.5  | 40.2  | 13.1  | 27.9  | 30.7  | 28.5  | 20.8  | 25.2  | 3.5 | 59.8                     |       |       | 20.6  | 112.6 | 12.6  | 5.1   | 36.2  | 27.4  | 39.2 | 13.1 |
| 1.30       | 2.9                      | 25.1  | 24.2  | 16.5  | 23.5  | 6.7   | -9.4  | 18.0  | 13.4  | 4.4 | 48.3                     | 30.3  | 22.5  | 40.6  | 11.3  | -2.6  | 56.1  | 46.0  | 31.6  | 7.1  |      |
| 2.00       | 15.8                     | 35.0  | 18.4  | 16.4  | 15.7  | 21.9  | 17.5  | 22.5  | 20.4  | 2.3 | 41.2                     | 19.8  | 22.8  | 17.5  | 26.2  | 12.1  | 15.6  | 8.1   | 20.4  | 3.6  |      |
| 2.30       | 15.3                     | 36.3  | 18.7  | 13.5  | 20.8  | 26.8  | 25.1  | 20.3  | 22.1  | 2.6 | 34.3                     | 6.8   | 27.3  | 16.7  | 17.3  | -1.5  | 36.8  | 27.9  | 20.7  | 4.7  |      |
| 3.00       | 7.7                      | 33.0  | 12.1  | 14.0  | 13.7  | 31.1  | 17.4  | 20.9  | 18.8  | 3.2 | 29.9                     | -0.3  | 15.7  | 24.4  | 12.7  | -2.7  | 40.3  | 31.2  | 18.9  | 5.4  |      |
| 3.30       | 5.4                      | 28.4  | 16.4  | 12.8  | -15.5 | 33.4  | 13.6  | 20.6  | 14.4  | 5.3 | 27.4                     | 5.2   | 17.9  | 26.7  | 12.2  | 0.7   | 48.7  | 39.1  | 22.2  | 5.8  |      |
| 4.00       | 1.8                      | 24.5  | 16.6  | 6.9   | -18.5 | 30.3  | 10.5  | 16.7  | 11.1  | 5.3 | 26.4                     | 5.9   | 13.9  | 24.6  | 12.0  | -6.6  | 42.2  | 33.0  | 18.9  | 5.5  |      |
| 4.30       | -2.8                     | 18.1  | 13.6  | -1.1  | -15.3 | 26.8  | 6.6   | 15.6  | 7.7   | 4.8 | 26.7                     | 3.3   | 11.8  | 28.2  | 8.4   | -8.6  | 36.6  | 27.8  | 16.8  | 5.5  |      |
| 5.00       | -11.1                    |       | 7.0   | -4.5  | -14.1 |       |       | 10.8  | -2.4  | 4.9 | 16.3                     | -4.9  | 10.9  | 29.7  | 3.8   | -13.3 | 33.9  | 25.2  | 12.7  | 5.9  |      |
| 5.30       | -17.7                    | -3.9  | 3.6   |       |       | 10.4  | -16.2 | 4.9   | -3.2  | 4.8 | 10.0                     | -8.0  | 5.6   | 30.7  | 0.2   | -16.5 | 27.6  | 19.3  | 8.6   | 5.9  |      |
| 6.00       | -25.8                    | -9.6  | -4.4  | -17.0 | -22.0 | 3.8   | -21.9 | -3.0  | -12.5 | 3.8 | 5.5                      | -13.4 | 1.7   | 27.9  | -3.6  | -23.2 | 16.6  | 9.0   | 2.5   | 5.7  |      |
| 6.30       | -40.1                    | -13.2 | -7.9  | -25.7 | -24.5 | -5.1  | -28.1 | -9.1  | -19.2 | 4.3 | -13.3                    | -17.2 |       | 24.5  | -6.7  | -26.9 | 13.1  | 5.8   | -3.0  | 6.9  |      |
| 7.00       | -45.7                    | -26.2 | -13.4 | -34.7 | -30.9 | -14.7 | -33.8 | -17.8 | -27.1 | 4.0 | -11.7                    | -22.3 | 0.8   | 21.3  | -11.4 | -31.5 | 8.2   | 1.2   | -5.7  | 6.0  |      |
| 7.30       | -56.7                    | -33.0 | -19.2 | -42.0 | -37.3 | -24.2 | -44.7 | -30.2 | -35.9 | 4.2 | -15.6                    | -27.6 | -3.3  | 17.9  | -17.6 | -38.2 | 0.4   | -6.1  | -11.3 | 6.2  |      |
| 8.00       | -66.5                    | -41.2 |       | -46.3 |       |       |       |       | -51.3 | 7.7 | -22.4                    | -34.0 | -9.4  | 12.1  | -23.7 | -43.6 | -10.6 | -16.4 | -18.5 | 6.0  |      |
| 8.30       | -66.6                    | -51.9 | -37.3 | -55.8 | -49.9 | -48.5 |       |       | -51.7 | 3.9 | -26.9                    | -40.1 | -13.1 | 5.7   | -29.4 | -45.3 | -27.8 | -32.5 | -26.2 | 5.7  |      |
| 9.00       | -69.9                    | -57.7 | -41.8 | -59.2 | -55.4 | -57.6 | -71.6 | -56.0 | -58.7 | 3.3 | -35.8                    | -49.5 | -16.6 | -1.1  | -34.5 | -43.9 | -42.6 | -46.3 | -33.8 | 5.9  |      |
| 9.30       | -71.3                    |       | -47.6 | -62.0 | -61.0 | -61.5 | -71.4 | -59.7 | -62.1 | 3.0 | -42.9                    | -57.0 | -22.9 | -9.1  | -38.5 |       | -55.4 | -58.3 | -40.6 | 7.1  |      |
| 10.00      | -71.6                    | -69.9 | -52.5 | -63.7 |       |       |       |       | -64.3 | 3.3 | -50.4                    | -61.5 | -31.0 | -17.7 | -41.5 |       |       |       | -40.4 | 7.6  |      |

SEM; standard error of the mean
