# Supplementary material for: Circulatory Responses to Asphyxia Differ if the Asphyxia Occurs In Utero or Ex Utero in Near-Term Lambs
Source: PubMed Central journal article supplement (PMC4230987; doi:10.1371/journal.pone.0112264), 2014-11-13
Supplement: pone.0112264.s003.pdf [file pone.0112264.s003.pdf]

Table S3. End diastolic pressure (% change from fetal) of individual *in utero* and *ex utero* asphyxia animals from start of asphyxia

| time (min) | Asphyxia <i>in utero</i> |       |       |       |       |       |       |       |       |     | Asphyxia <i>ex utero</i> |       |       |       |       |       |      |       |     |  |
|------------|--------------------------|-------|-------|-------|-------|-------|-------|-------|-------|-----|--------------------------|-------|-------|-------|-------|-------|------|-------|-----|--|
|            | 1                        | 2     | 3     | 4     | 5     | 6     | 7     | 8     | mean  | SEM | 1                        | 2     | 3     | 4     | 5     | 6     | 7    | mean  | SEM |  |
| fetal      | 0.0                      | 0.0   | 0.0   | 0.0   | 0.0   | 0.0   | 0.0   | 0.0   | 0.0   | 0.0 | 0.0                      | 0.0   | 0.0   | 0.0   | 0.0   | 0.0   | 0.0  | 0.0   | 0.0 |  |
| 0.00       | -1.9                     | 37.4  | 22.3  | 31.1  | 20.4  | 18.5  | 24.1  | 14.1  | 20.8  | 4.1 | 14.5                     | 25.0  | 22.8  |       | 11.7  | 2.5   | 14.5 | 15.1  | 3.1 |  |
| 0.30       | 51.5                     | 60.9  | 47.7  | -6.7  | 13.4  | 30.0  | 32.5  | 29.9  | 32.4  | 8.2 | 35.3                     |       | 30.4  |       |       | 37.6  |      | 34.4  | 1.6 |  |
| 1.00       | 71.5                     | 55.5  | 57.7  | 13.7  | 25.6  | 34.8  | 35.6  | 19.7  | 39.3  | 7.2 |                          |       | 50.8  |       |       | 47.6  | 30.7 | 43.1  | 6.2 |  |
| 1.30       | 50.1                     | 53.8  | 37.8  | 11.7  | 26.4  | 14.3  | -3.5  | 22.1  | 26.6  | 7.0 |                          | 45.1  | 39.4  | 31.7  | 14.3  |       | 8.2  | 27.8  | 6.5 |  |
| 2.00       | 41.3                     | 58.2  | 30.2  | 17.2  | 18.2  | 29.6  | 23.5  | 18.6  | 29.6  | 5.0 | 40.8                     | 28.3  | 37.3  | 19.9  | 28.9  |       |      | 31.1  | 3.4 |  |
| 2.30       | 45.6                     | 54.2  | 28.1  | 16.9  | 15.9  | 26.6  | 28.4  | 20.3  | 29.5  | 4.8 |                          | 17.0  |       | 16.9  | 14.6  | 36.5  |      | 21.2  | 4.6 |  |
| 3.00       | 48.7                     | 55.7  | 22.7  | 11.3  | -3.7  | 34.0  | 16.6  | 19.5  | 25.6  | 6.9 | 20.1                     |       | 39.0  |       | 6.6   | 41.3  |      | 26.8  | 6.7 |  |
| 3.30       | 34.5                     | 52.6  | 29.1  | 12.8  | -23.4 | 40.1  | 14.7  | 19.1  | 22.4  | 8.1 | 29.0                     |       | 34.0  |       | 7.8   | 46.7  |      | 29.4  | 7.3 |  |
| 4.00       | 32.3                     | 45.2  | 30.9  | 6.7   | -21.4 | 40.8  | 10.6  | 15.3  | 20.1  | 7.7 | 27.6                     | 18.6  | 29.3  | 19.4  | 9.9   | 41.4  |      | 24.4  | 4.1 |  |
| 4.30       | 23.2                     |       | 28.2  | -3.7  | -17.9 | 36.7  | 7.0   |       | 12.2  | 7.4 | 27.8                     | 13.8  | 29.0  | 23.4  | 5.6   | 38.2  |      | 23.0  | 4.4 |  |
| 5.00       |                          |       | 18.2  | -9.7  |       | 32.0  |       | 7.2   | 11.9  | 7.9 | 16.7                     | 3.8   | 27.7  | 25.8  | -0.6  | 36.5  |      | 18.3  | 5.5 |  |
| 5.30       | 8.5                      |       | 10.5  |       | -19.8 | 15.6  | -17.5 | -0.3  | -0.5  | 6.1 | 11.1                     | 0.3   | 18.4  | 26.9  | -5.1  | 32.1  |      | 13.9  | 5.5 |  |
| 6.00       | -6.2                     | -37.8 | 4.0   | -27.6 | -29.5 | 7.9   | -22.2 | -7.9  | -14.9 | 5.9 | 6.3                      | -7.9  | 3.0   | 25.0  | -8.6  | 20.6  |      | 6.4   | 5.3 |  |
| 6.30       | -19.6                    | -48.3 | -4.1  | -32.2 | -32.7 | -3.0  | -34.7 | -15.3 | -23.7 | 5.6 | 3.5                      | -14.9 | -1.1  | 22.9  | -13.0 | 14.1  |      | 1.9   | 5.6 |  |
| 7.00       | -34.1                    | -57.2 | -11.1 | -41.4 | -38.8 | -16.2 | -43.3 | -30.4 | -34.1 | 5.3 | -15.4                    | -19.0 | 15.8  | 19.7  | -18.1 | 9.6   |      | -1.2  | 6.9 |  |
| 7.30       | -43.8                    | -66.3 | -17.8 | -56.3 | -47.1 | -28.0 | -52.5 | -38.3 | -43.8 | 5.5 | -13.5                    | -26.0 | 10.5  | 15.9  | -24.1 | 1.3   |      | -6.0  | 6.7 |  |
| 8.00       | -50.9                    |       |       |       | -47.0 |       |       |       | -49.0 | 1.6 |                          | -37.8 | 3.7   | 10.7  | -32.3 | -10.7 |      | -13.3 | 8.7 |  |
| 8.30       | -61.6                    |       |       |       | -49.6 | -51.6 |       | -61.3 | -56.0 | 2.6 | -30.4                    | -41.1 | -2.0  | 5.1   | -35.8 | -24.1 |      | -21.4 | 7.1 |  |
| 9.00       | -58.8                    | -21.7 | -41.2 | -66.2 | -53.7 | -56.9 | -72.3 | -65.2 | -54.5 | 5.7 | -41.3                    | -47.9 | -6.9  | -3.3  | -40.4 | -42.9 |      | -30.5 | 7.5 |  |
| 9.30       | -63.1                    |       | -50.0 | -76.4 | -58.2 | -61.9 | -76.9 | -69.2 | -65.1 | 3.7 | -50.0                    | -53.5 | -13.1 | -11.3 |       | -48.2 |      | -35.2 | 8.6 |  |
| 10.00      | -63.9                    | -80.8 | -54.4 | -81.6 |       |       |       | -72.3 | -70.6 | 5.2 | -58.6                    | -59.6 | -20.7 | -22.0 |       |       |      | -40.2 | 9.8 |  |

SEM, standard error of the mean
