# Supplementary material for: Circulatory Responses to Asphyxia Differ if the Asphyxia Occurs In Utero or Ex Utero in Near-Term Lambs
Source: PubMed Central journal article supplement (PMC4230987; doi:10.1371/journal.pone.0112264), 2014-11-13
Supplement: pone.0112264.s004.pdf [file pone.0112264.s004.pdf]

Table S4. Pulse amplitude (% change from fetal) of individual *in utero* and *ex utero* asphyxia animals from start of asphyxia

| time (min) | Asphyxia <i>in utero</i> |       |       |      |       |       |       |      |       |      | Asphyxia <i>ex utero</i> |       |       |      |       |       |       |       |      |
|------------|--------------------------|-------|-------|------|-------|-------|-------|------|-------|------|--------------------------|-------|-------|------|-------|-------|-------|-------|------|
|            | 1                        | 2     | 3     | 4    | 5     | 6     | 7     | 8    | mean  | SEM  | 1                        | 2     | 3     | 4    | 5     | 6     | 7     | mean  | SEM  |
| fetal      | 0.0                      | 0.0   | 0.0   | 0.0  | 0.0   | 0.0   | 0.0   | 0.0  | 0.0   | 0.0  | 0.0                      | 0.0   | 0.0   | 0.0  | 0.0   | 0.0   | 0.0   | 0.0   | 0.0  |
| 0.00       | -0.3                     | 4.8   | 42.9  | 58.0 | 36.1  | 31.9  | 15.4  | 7.7  | 24.6  | 7.3  | 15.8                     | -21.3 | -4.3  |      | -2.5  | -1.4  | -10.1 | -4.0  | 5.0  |
| 0.30       | 37.8                     | 63.3  | 46.2  | 33.6 | 33.0  | 39.8  | 22.1  | 59.4 | 41.9  | 5.2  | 21.2                     |       | 10.8  |      | 8.8   | -10.2 |       | 7.7   | 6.5  |
| 1.00       | 60.1                     | 7.4   | 58.2  | 56.4 | 70.6  | 39.5  | 24.7  | 56.6 | 46.7  | 7.5  |                          |       | -4.0  |      |       | 2.4   | -16.5 | -6.0  | 5.5  |
| 1.30       | 9.6                      | 9.0   | 44.5  | 56.6 | 92.0  | 12.5  | -12.5 | 67.5 | 34.9  | 12.6 |                          | -7.2  | -8.7  | 22.0 | -18.4 | 5.7   | -17.4 | -4.0  | 6.3  |
| 2.00       | 30.5                     | 38.3  | 50.3  | 28.2 | 77.2  | 56.9  | 17.4  | 61.0 | 45.0  | 7.0  | 33.5                     | -13.2 | -5.4  | -3.5 | -1.2  |       |       | 2.0   | 8.1  |
| 2.30       | 54.9                     | 59.2  | 69.1  | 23.0 | 125.6 | 103.9 | 45.8  | 47.2 | 66.1  | 11.8 |                          | -1.4  |       | 6.0  | 39.2  |       |       | 14.6  | 12.5 |
| 3.00       | 33.6                     | 41.3  | 44.1  | 51.4 | 147.7 | 91.9  | 49.0  | 33.0 | 61.5  | 14.0 | 50.7                     |       | -22.0 |      | 45.1  |       |       | 24.6  | 23.4 |
| 3.30       | 42.4                     | 37.3  | 37.5  | 46.5 | 189.4 | 61.9  | 41.1  | 32.1 | 61.0  | 18.6 | 29.8                     |       | -20.3 |      | 42.0  | 51.2  |       | 25.7  | 15.9 |
| 4.00       | 30.6                     | 38.6  | 20.9  | 38.5 | 151.3 | 41.8  | 40.5  |      | 51.7  | 16.8 | 13.9                     | -15.4 | -23.8 | 96.6 | 31.3  | 29.7  |       | 22.0  | 17.6 |
| 4.30       | 37.2                     |       | 13.4  | 33.9 | 127.9 | 35.2  | 29.7  | 66.9 | 49.2  | 14.4 | 6.4                      | -10.2 | -27.1 | 91.7 | 17.1  | 10.0  |       | 14.7  | 16.7 |
| 5.00       |                          |       | 20.6  | 32.2 |       | 36.3  |       | 51.0 | 35.0  | 6.3  | -6.4                     | -1.5  | -25.7 | 86.5 | 16.4  | 2.3   |       | 11.9  | 15.9 |
| 5.30       | -5.3                     |       | 28.2  |      | 119.2 | 28.4  | 34.1  | 45.3 | 41.7  | 17.0 | -29.0                    | -2.3  | 26.8  | 81.7 | 19.9  | 9.3   |       | 17.8  | 15.1 |
| 6.00       | 10.8                     | 48.8  | 31.3  | 35.4 | 109.2 | 26.9  | 29.6  | 42.1 | 41.8  | 10.4 | -28.2                    | 3.2   | 22.3  | 62.4 | 23.3  | 9.6   |       | 15.4  | 12.1 |
| 6.30       | 6.6                      | 49.9  | 30.7  | 29.2 | 102.3 | 28.9  | 24.0  | 28.1 | 37.5  | 10.2 | -29.5                    | 1.8   | 17.5  | 49.2 | 23.8  | -3.0  |       | 10.0  | 10.9 |
| 7.00       | 6.3                      | 44.3  | 32.9  | 22.8 | 89.1  | 29.9  | 22.6  | 34.3 | 35.3  | 8.6  | 3.5                      | -4.5  | -36.8 | 42.8 | 20.4  | -10.2 |       | 2.5   | 11.1 |
| 7.30       | -10.5                    | 53.5  | 35.1  | 25.2 | 67.3  | 25.8  | 14.7  |      | 30.2  | 9.6  | 8.0                      | 0.1   | -38.8 | 39.6 | 16.1  | -25.1 |       | 0.0   | 11.6 |
| 8.00       | -25.5                    | 42.0  |       |      | -11.2 |       |       | 25.6 | 7.7   | 15.7 |                          |       | -39.2 | 36.8 | 7.0   | -32.4 |       | -2.5  | 14.5 |
| 8.30       | -43.6                    | 33.4  |       |      | -17.6 | -14.6 |       | 18.6 | -4.8  | 13.7 | 43.1                     | -2.3  | -38.5 | 31.6 | 4.0   | -60.5 |       | -3.8  | 16.3 |
| 9.00       | -53.2                    | 15.1  | 18.4  | 5.2  | -26.6 | -26.4 | -35.0 | 11.0 | -11.4 | 9.6  |                          | -11.7 | -38.8 | 24.5 | 0.6   |       |       | -6.4  | 11.8 |
| 9.30       | -58.4                    |       | -4.2  | 11.6 | -50.5 | -40.4 | -48.9 | 3.6  | -26.7 | 11.1 |                          | -23.7 | -41.9 | 18.3 | -4.6  |       |       | -13.0 | 11.6 |
| 10.00      | -60.0                    | -10.5 | -15.7 | 15.6 |       |       |       |      | -17.7 | 15.7 |                          | -41.0 | -45.4 | 9.1  | -7.7  |       |       | -21.2 | 11.8 |

SEM, standard error of the mean
