# Supplementary material for: Circulatory Responses to Asphyxia Differ if the Asphyxia Occurs In Utero or Ex Utero in Near-Term Lambs
Source: PubMed Central journal article supplement (PMC4230987; doi:10.1371/journal.pone.0112264), 2014-11-13
Supplement: pone.0112264.s005.pdf [file pone.0112264.s005.pdf]

Table S5. Max dP/dt (% change from fetal) of individual *in utero* and *ex utero* asphyxia animals from start of asphyxia

| time (min) | Asphyxia <i>in utero</i> |       |       |      |       |       |       |       |       |      | Asphyxia <i>ex utero</i> |       |       |       |       |       |       |       |      |
|------------|--------------------------|-------|-------|------|-------|-------|-------|-------|-------|------|--------------------------|-------|-------|-------|-------|-------|-------|-------|------|
|            | 1                        | 2     | 3     | 4    | 5     | 6     | 7     | 8     | mean  | SEM  | 1                        | 2     | 3     | 4     | 5     | 6     | 7     | mean  | SEM  |
| fetal      | 0.0                      | 0.0   | 0.0   | 0.0  | 0.0   | 0.0   | 0.0   | 0.0   | 0.0   | 0.0  | 0.0                      | 0.0   | 0.0   | 0.0   | 0.0   | 0.0   | 0.0   | 0.0   | 0.0  |
| 0.00       | 29.3                     | -8.9  | 46.2  | 83.9 | 18.9  | 21.4  | 19.3  | -15.4 | 24.4  | 11.0 | -56.2                    | -16.3 | -7.4  | 0.3   | 0.6   | -13.6 | -5.5  | -14.0 | 8.8  |
| 0.30       | 45.4                     | 59.4  | 38.4  |      | 13.3  | 20.8  | 14.0  | 7.6   | 28.4  | 7.4  | -51.3                    | -19.4 |       | -21.0 |       | 14.1  | -19.4 | 12.0  |      |
| 1.00       | 0.6                      | -17.1 | 48.3  | 57.0 | 47.8  | 16.9  | 22.3  | -10.0 | 20.7  | 10.0 | -33.5                    |       | -3.1  | -44.7 | -31.4 | -21.8 | -19.6 | -25.7 | 6.4  |
| 1.30       | 11.6                     | -1.0  | 24.9  | 68.6 | 79.6  | -6.8  | -14.6 | 36.8  | 24.9  | 12.3 |                          | 7.3   | -9.0  | -23.1 | -23.1 |       | -24.3 | -14.5 | 6.1  |
| 2.00       | 30.2                     | 46.8  | 21.1  | 35.4 | 74.6  | 33.0  | 13.5  | 61.6  | 39.5  | 7.2  | -61.7                    | -4.8  | -6.6  | -13.0 | -12.6 | -11.0 | 54.3  | -7.9  | 15.1 |
| 2.30       | 13.9                     | 38.2  | 12.9  | 36.1 | 113.8 | 66.4  | 42.0  | 66.7  | 48.7  | 11.7 | -65.2                    | 18.7  |       | -14.5 | 9.0   | 76.0  | 94.4  | 19.7  | 26.3 |
| 3.00       | 14.1                     | 26.5  | 10.2  | 66.0 |       | 46.0  | 41.9  | 40.8  | 35.0  | 7.4  | -57.5                    | 55.7  | -12.2 |       | 2.3   | 79.8  | 103.7 | 28.6  | 27.4 |
| 3.30       | 4.7                      | 19.2  |       | 63.5 |       | 22.2  | 36.8  | 25.2  | 28.6  | 8.2  | -63.9                    |       | -14.1 |       | 2.7   | 76.5  | 105.3 | 21.3  | 30.8 |
| 4.00       | 8.8                      |       | -11.1 | 54.2 |       | 12.6  | 38.0  | 15.7  | 19.7  | 9.4  | -68.4                    | -17.4 | -15.7 | -12.3 | -8.6  | 48.4  | 93.3  | 2.8   | 23.4 |
| 4.30       |                          |       | -17.5 | 44.6 |       | 9.3   | 26.3  | 46.7  | 21.9  | 12.0 | -72.1                    | -13.5 | -17.2 | -12.0 | -10.8 | 36.2  | 76.8  | -1.8  | 20.9 |
| 5.00       |                          |       | -9.2  | 39.1 |       |       |       | 30.2  | 20.0  | 14.9 | -69.7                    | -15.1 | -14.7 |       | -7.1  | 29.4  | 61.6  | -2.6  | 20.0 |
| 5.30       |                          | 16.9  | -3.5  |      |       | 3.3   | 22.7  | 13.3  | 10.5  | 4.7  |                          | -4.5  |       | -5.5  | 0.0   | 22.8  | 57.1  | 14.0  | 11.9 |
| 6.00       | -9.2                     | 25.6  | 2.3   | 47.4 | 93.3  | 1.5   | 27.7  | 16.4  | 25.6  | 11.6 | -71.6                    | -3.2  |       | 4.4   | 2.9   | 33.2  | 55.8  | 3.6   | 19.3 |
| 6.30       | -4.4                     | 23.2  | 4.8   | 39.9 | 85.1  | 6.9   | 25.9  | 23.5  | 25.6  | 9.9  |                          | 12.7  |       | -1.1  | 2.3   | 36.1  | 45.3  | 19.1  | 9.2  |
| 7.00       | -17.3                    | 22.8  | 4.3   | 30.1 | 71.4  | 5.0   | 19.0  | 16.1  | 18.9  | 9.1  | -59.6                    | 10.2  | -26.1 | 0.6   | 1.2   | 28.5  | 40.9  | -0.6  | 15.1 |
| 7.30       |                          | 19.3  | 7.7   | 21.8 | 52.6  | -1.3  | 7.7   |       | 18.0  | 7.7  |                          | 18.1  | -27.4 | 4.5   | -2.8  | 22.1  | 38.1  | 8.8   | 10.2 |
| 8.00       |                          | 10.7  |       |      | -12.1 |       |       | 5.4   | 1.4   | 6.9  |                          | 23.6  | -27.7 | 11.9  | -4.6  | 14.4  | 34.5  | 8.7   | 9.9  |
| 8.30       | -56.0                    | 4.0   |       |      | -16.3 | -31.9 | -40.2 | -2.7  | -23.8 | 9.4  | -35.8                    | 15.6  | -27.7 | 9.0   | -7.5  | 3.2   | 28.0  | -2.2  | 10.3 |
| 9.00       | -60.9                    | -6.4  | -11.2 | 2.8  | -28.3 | -40.6 | -49.2 | -10.8 | -25.6 | 8.1  | -19.3                    | 3.3   | -31.4 | 7.1   | -14.0 | -31.2 | 19.7  | -9.4  | 8.9  |
| 9.30       | -62.9                    |       | -17.5 | 1.5  | -49.4 | -50.4 | -55.3 | -18.9 | -36.1 | 9.2  | -5.1                     | -17.2 | -35.2 | 3.5   | -14.4 |       | 12.7  | -9.3  | 7.5  |
| 10.00      | -61.3                    |       | -25.0 | -4.4 |       |       |       |       | -30.2 | 16.6 | 8.1                      | -31.8 | -42.0 | -9.0  | -19.3 |       | 2.2   | -15.3 | 8.7  |

Max dP/dt, Maximum rate of blood pressure increase during systole; SEM, standard error of the mean
